# Supplementary material
Source: PubMed Central journal article supplement (PMC2695800)

## **Supplementary Figure Legends**

### **Figure S1: Time-course of NE fusion (HMG1-GFP)**

A cell expressing Htb2p-mRFP (ATY2835) was crossed with a cell expressing HMG1-GFP (ATY1528). Note that the appearance of HMG1-GFP signal in the *trans*-NE precedes its arrival in the *trans* cortical ER. Ch: chromatin.

### **Figure S2: FRAP for HMG1-GFP, GFP-Prm3p, GFP-Esc1p**

Haploid cells were photobleached three times (arrows) and recovery of signal was then followed every 5 seconds. The cells expressed either HMG1-GFP (ATY1528), GFP-Esc1p (ATY1550) or GFP-Prm1p (ATY3236). The dark blue line indicates the area which was bleached, the pink line is from a nearby region of NE, and the yellow line is equidistant cortical ER (for HMG1-GFP).

### **Figure S3: Impact of DTT**

#### **A: Time course of inhibition of karyogamy by DTT.**

Cells expressing Htb2p-mRFP (ATY2835, ATY2289) were used for a standard two-step assay. After recovery from the nocodazole plates, 96-99% had separate nuclei, 0-3% showed nuclear contact, and 1% had fused nuclei. They were then further incubated +/- 2mM DTT for 2, 3 or 4 hr and zygotes were classified as have separate nuclei, nuclei in contact with each other, or fused nuclei. DTT causes extensive inhibition of fusion and corresponding increases in images of contact.

#### **B: The impact of DTT is not reduced by overexpression of Kar2p.**

Two wt strains carrying pGAL-KAR2 were pregrown overnight in 2% galactose medium and crossed (ATY3253, AY3254), by comparison to the same parental strains carrying an empty plasmid (ATY3257, ATY3227). After preincubation on nocodazole-galactose plates, they were transferred to galactose medium with 0-5mM DTT and incubated for 2 hr. The percent of cells with separate nuclei, nuclei in contact, and fused nuclei was then determined. Note that the dose-response curve for DTT is not affected by the attempts at overexpression of Kar2p. All media included 2% raffinose and 0.1% fructose.

**Figure S4: Representative FRAP evaluation of *cis-trans* diffusion of HMG1-GFP**

A haploid cell (1), an early prezygote (2) and a later prezygote (3) were studied. The prezygotes are from crosses of HMG1-GFP-expressing cells (ATY1528) with non-fluorescent wt cells. In each of the three series, a small square area of NE was photobleached (white square). Recording was either from the same square (dark blue line), a second part of the same NE (pink square and line), and area from the *trans* NE (yellow square and line), or an irrelevant area of a bystander cell (light blue square and line). Images were collected every three seconds. Bleaching is indicated by the vertical arrows. Note the close *cis* coupling between the different areas of the NE and the lack of *trans* coupling even after dilation of the nexus.

**Figure S5: Evaluation of the *cis*-first model of NE fusion.**

As indicated in Figure S1, this model has the unattractive property of possibly allowing momentary leakage of nuclear content to the cytoplasm. It nevertheless appears topologically equivalent to mitotic NE breakdown in higher eukaryotes and half-open

mitosis, e.g. (Straube *et al.*, 2005). Moreover, even chromosomes can escape from the yeast nucleus during congression in *kar1-1* (Dutcher, 1981). We have taken first steps to evaluate this model by following a nucleoplasmic tracer (GFP-TBP) during karyogamy. We do not see evidence of its transient leakage to the cytoplasm during karyogamy. What is illustrated is a cross between cells expressing GFP-TBP1 (ATY2836 x ATY2289). It shows that the intense nuclear signal present before nuclear contact is not detectably released to the cytoplasm upon karyogamy. Control experiments show that at least 10 minutes are required for any cytoplasmic GFP-TBP to be extensively imported into the nucleus. N: nucleus, V: vacuole.

#### **Figure S6: Impact of latrunculin A on congression**

Crosses between ATY3629 (which expresses Spc42-mRFP, Tub1-GFP and Nup49-GFP) and ATY2289 (which expresses Htb2p-mRFP) were interrupted after two hrs and cells were then transferred to liquid medium containing 0.2 mM latrunculin A for 30-60 min before imaging. Note the erratic position of the SPBs (\*) and the mis-orientation of the microtubule cables (arrows). The red images are included to make the tagged SPB visible (\*). The lower pair includes a grazing section of the lower nucleus which does not make the NPCs visible.

#### **References:**

Dutcher, S.K. (1981). Internuclear transfer of genetic information in *kar1-1*/KAR1 heterokaryons in *Saccharomyces cerevisiae*. *Mol Cell Biol* 1, 245-253.  
Straube, A., Weber, I., and Steinberg, G. (2005). A novel mechanism of nuclear envelope break-down in a fungus: nuclear migration strips off the envelope. *Embo J* 24, 1674-1685.

**Table SI. Strains Used in this Study**

| <u>Name</u> | <u>Relevant Genotype</u>                                             | <u>Strain Origin</u>      | <u>Plasmid Name</u> |
|-------------|----------------------------------------------------------------------|---------------------------|---------------------|
| ATY1454     | MAT a Spc42-GFP                                                      | IAY18, J. Kilmartin       |                     |
| ATY1455     | MAT $\alpha$ SPC42-CFP                                               | J. Kilmartin, JK1659      |                     |
| ATY1467     | MAT a <i>kar2-1</i>                                                  | MS1111, M. Rose           |                     |
| ATY1513     | MAT $\alpha$ SIK1-mRFP                                               | E. O'Shea                 |                     |
| ATY1515     | MAT $\alpha$ SPC42-mRFP                                              | E. O'Shea                 |                     |
| ATY1528     | MAT $\alpha$ HMG1 <sub>1-702</sub> -GFP                              | SFNY1162, S. Ferro-Novick |                     |
| ATY1529     | MAT a HMG1 <sub>1-702</sub> -GFP                                     | SFNY1163, S. Ferro-Novick |                     |
| ATY1550     | MAT $\alpha$ GAL-GFP-ESC1                                            | YDZ49, R. Sternglanz      |                     |
| ATY1713     | MAT a <i>kar2-1</i> [pNUP49-GFP]                                     | MS1111                    | AT635               |
| ATY1774     | MAT a SPC42-mRFP                                                     | This study, E. O'Shea     |                     |
| ATY1812     | MAT $\alpha$ SIK1-mRFP SPC42-mRFP                                    | This study                |                     |
| ATY1816     | MAT a NUP49-GFP SPC42-mRFP                                           | This study                |                     |
| ATY1817     | MAT a NUP49-GFP SPC42-mRFP                                           | This study                |                     |
| ATY1897     | MAT a MID2-GFP NUP49-GFP<br>SIK1-mRFP SPC42-mRFP                     | This study                |                     |
| ATY1916     | MAT $\alpha$ MID2-GFP NUP49-GFP<br>SPC42-mRFP                        | This study                |                     |
| ATY1917     | MAT a SIK1-mRFP SPC42-mRFP                                           | This study                |                     |
| ATY1919     | MAT a MID2-GFP SIK1-mRFP<br>SPC42-mRFP                               | This study                |                     |
| ATY1920     | MAT $\alpha$ MID2-GFP SIK1-mRFP<br>SPC42-mRFP                        | This study                |                     |
| ATY2089     | MAT a <i>cdc12-6</i>                                                 | E. Bi #743                |                     |
| ATY2102     | MAT a GAL-GFP-ESC1                                                   | YDZ49, R. Sternglanz      |                     |
| ATY2138     | MAT $\alpha$ <i>sec18-1</i> [pNUP49-GFP]                             | RSY271                    | AT735               |
| ATY2226     | MAT $\alpha$ NUP49-GFP                                               | This study                |                     |
| ATY2229     | MAT a <i>cdc48-3 bub2<math>\Delta</math> mad2<math>\Delta</math></i> | YZY36, Y. Zheng           | AT986               |

|         |                                                                                             |                            |               |
|---------|---------------------------------------------------------------------------------------------|----------------------------|---------------|
|         | [pNUP49-GFP]                                                                                |                            |               |
| ATY2632 | MAT $\alpha$ <i>cdc48-3 bub2<math>\Delta</math> mad2<math>\Delta</math></i><br>[pNUP49-GFP] | YZY36, Y. Zheng            | AT986         |
| ATY2289 | MAT $\alpha$ HTB2-mRFP                                                                      | W303                       |               |
| ATY2404 | MAT a [pNM22]                                                                               | W303                       | AT948         |
| ATY2524 | MATa HTB2-mRFP <i>leu2::TUB1-GFP</i>                                                        |                            | AT994, AT1180 |
| ATY2538 | MAT a <i>sec18-1</i> [pNUP49-GFP]                                                           | ATY2138, W303              | AT986         |
| ATY2549 |                                                                                             |                            |               |
| ATY2594 | MAT a HTB2-mRFP [pNUP49-GFP]                                                                | ATY2835                    | AT986         |
| ATY2673 | MAT a HTB2-GFP                                                                              | W303                       |               |
| ATY2699 | MAT a <i>esc1<math>\Delta</math> mlp1<math>\Delta</math> mlp2<math>\Delta</math></i>        | YDZ237, R. Sternglanz      |               |
| ATY2782 | MAT $\alpha$ <i>prm3<math>\Delta</math></i>                                                 | T. Lithgow                 |               |
| ATY2784 | MAT alpha <i>ndc10-1</i> HTB2-mRFP                                                          | W303, PWY611, J. Kilmartin |               |
| ATY2823 | MAT a [pMET25-GFP-PRM3]                                                                     | W303                       | AT1143        |
| ATY2835 | MAT a HTB2-mRFP                                                                             | W303                       |               |
| ATY2836 | MAT a [pGFP-TBP]                                                                            | W303                       | AT622         |
| ATY3004 | MAT $\alpha$ SPC42-mRFP [pGAR1-GFP]                                                         | E. O'Shea                  | AT624         |
| ATY3034 | MAT a SPB42-mRFP <i>leu2::TUB1-GFP</i>                                                      |                            | AT994         |
| ATY3053 | MAT a HTB2-mRFP [pRS316]                                                                    | ATY2835                    |               |
| ATY3129 | MAT $\alpha$ [pCox4-dsRed]                                                                  | W303                       | AT988         |
| ATY3768 | MAT a <i>ndc10-1</i> tetO (CENV) tetR-GFP                                                   | C. Antony T4734            |               |

|         |                                                       |                          |        |
|---------|-------------------------------------------------------|--------------------------|--------|
| ATY3131 | MAT $\alpha$ <i>prm3</i> $\Delta$ [pNUP49-GFP]        | T. Lithgow               | AT986  |
| ATY3149 | MAT $\alpha$ [pMET25-GFP-PRM3]                        | W303                     | AT1143 |
| ATY3196 | MAT $\alpha$ <i>ura3</i> ::mRFP-HDEL                  | W303                     | AT1180 |
| ATY3197 | MAT a <i>kar2-1 ura3</i> ::mRFP-HDEL                  | MS1111, M. Rose          | AT1180 |
| ATY3198 | MAT a <i>kar1-1</i>                                   | MY686, 8960-14B, M. Rose |        |
| ATY3199 | MAT a <i>kar1-1 ura3</i> ::mRFP-HDEL                  | MY686, 8960-14B, M. Rose | AT1180 |
| ATY3216 | MAT a <i>prm3D ura3</i> ::mRFP-HDEL                   | T. Lithgow               | AT1180 |
| ATY3220 | MAT $\alpha$ [pGAR1-GFP]                              | W303                     | AT624  |
| ATY3222 | MAT a [pSEC63-GFP]                                    | W303                     | AT1038 |
| ATY3223 | MAT a [pGFP-HDEL]                                     | W303                     | AT1182 |
| ATY3227 | MAT a HTB2-mRFP [pRS316]                              | ATY2289                  |        |
| ATY3236 | MAT a [pMET-GFP-PRM3]                                 | W303                     | AT1143 |
| ATY3253 | MAT a HTB2-mRFP [pGAL-KAR2]                           | ATY2289                  | AT1174 |
| ATY3254 | MAT $\alpha$ HTB2-mRFP [pGAL-KAR2]                    | ATY2835                  | AT1174 |
| ATY3257 | MAT a HTB2-mRFP [pRS316]                              | ATY2835                  |        |
| ATY3277 | MAT a <i>prm3</i> $\Delta$ HMG1 <sub>1-702</sub> -GFP | This study               |        |
| ATY3298 | MAT $\alpha$ <i>prm3</i> $\Delta$ [pGAR1-GFP]         | T. Lithgow               | AT624  |
| ATY3331 | MAT a [pSEC63-mRFP]                                   | W303                     | AT1187 |
| ATY3342 | MAT a <i>ura3</i> ::mRFP-HDEL<br>leu2::TUB1-GFP       |                          |        |
| ATY3358 | MAT $\alpha$ HTB2-mRFP [pNUP49-GFP]                   | ATY2289                  | AT986  |
| ATY3359 | MAT $\alpha$ [pNUP49-GFP]                             | W303                     | AT986  |
| ATY3365 | MAT $\alpha$ SPC42-CFP <i>ura3</i> ::mRFP-HDEL        | JK659, J. Kilmartin      | AT1180 |
| ATY3373 | MAT a <i>kar1-1</i> [pGFP-HDEL]                       | MY686 (8960-14B)         | AT1182 |
| ATY3384 | MAT $\alpha$ <i>sec18-1 ura3</i> ::mRFP-HDEL          | W303                     |        |
| ATY3405 | MAT a [pNUP49-GFP]                                    | W303                     | AT986  |
| ATY3456 | MAT a <i>cdc12-6</i> HTB2-mRFP                        | ATY2089, ATY2289         |        |

|         |                                             |                                         |        |
|---------|---------------------------------------------|-----------------------------------------|--------|
| ATY3458 | MAT $\alpha$ <i>cdc12-6</i> HTB2-mRFP       | ATY2089, ATY2289                        |        |
| ATY3474 | MAT a <i>ire1</i> $\Delta$ HTB2-mRFP        | This study, PW370 (P. Walter), ATY2289  |        |
| ATY3476 | MAT $\alpha$ <i>ire1</i> $\Delta$ HTB2-mRFP | This study, PW370 (P. Walter), ATY2289  |        |
| ATY3525 | MAT a HMG1-GFP SPC42-mRFP                   | This study                              |        |
| ATY3528 | MAT a HTB2-mRFP [pHAC1i]                    | ATY2835                                 | AT1197 |
| ATY3529 | MAT a HTB2-mRFP [pHAC1i]                    | ATY2289                                 | AT1197 |
| ATY3629 | MAT a SPC42-mRFP TUB1-GFP [pNUP49-GFP]      | This study                              | AT986  |
| ATY3871 | MAT a <i>sec1-1 ura3::GFP</i> HTB2-mRFP     | AFB138=SF263-1C, A. Franzusoff; ATY2289 | AT1144 |
| ATY3872 | MAT $\alpha$ <i>sec1-1</i> HTB2-mRFP        | AFB138=SF263-1C, A. Franzusoff; ATY2289 |        |

Note: Isogenic pairs of strains were generated by transforming with pGAL-HO, inducing HO expression, plating on glucose medium, recovering colonies of the correct mating type, and eliminating the plasmid on 5'-FOA.

**Table SII. Plasmids Used in this Study**

| <u>Name</u> | <u>Original Name, Plasmid Type</u>    | <u>Expression Unit</u>       | <u>Source/Reference</u> |
|-------------|---------------------------------------|------------------------------|-------------------------|
| AT161       | pGAL-HO, CEN/URA3                     | GAL-HO                       | I. Herskowitz           |
| AT622       | pGFP-TBP, CEN/HIS3                    | GFP-TBP                      | A. Weil                 |
| AT624       | ZUT3, CEN/URA3                        | GAR1-GFP                     | P.E. Gleizes            |
| AT635       | pUN100-LEU2-GFP-NUP49                 | NUP49-GFP                    | V. Doye                 |
| AT948       | pNM22, CEN/URA3                       | MET25-HTB2-GFP               | L. Pemberton            |
| AT986       | p251, CEN/URA3                        | NUP49-GFP                    | V. Doye                 |
| AT988       | M376, CEN/URA3                        | COX4-dsRd                    | R. Jensen               |
| AT994       | BJ1351, LEU2, integ.                  | TUB1-GFP                     | J. Cooper               |
| AT1011      | BJ1333, URA3, integ.                  | TUB1-GFP                     | J. Cooper               |
| AT1038      | PJK59, CEN/URA3                       | SEC63-GFP                    | W. Prinz                |
| AT1143      | YCPyeGFP-PRM3, CEN/TRP1               | MET25-GFP-PRM3 (full length) | T. Lithgow              |
| AT1144      | pEG220, URA3, integ.                  | GFP-SSO1 fusion              | E. Grote                |
| AT1174      | pMR1341, CEN/URA3                     | GAL-KAR2                     | J. Brodsky/M. Rose      |
| AT1180      | pTi-kmRFP <sub>i</sub> , TRP1, integ. | mRFP-HDEL                    | N. Dean                 |
| AT1182      | pWP1055, CEN/URA3                     | GFP-HDEL                     | W. Prinz                |
| AT1197      | pPW1015=pJC835, CEN/HIS3              | HAC1i                        | P. Walter               |
| AT1037      | pSV3, ARS/TRP1                        | lacO repeat in YRP17         | S. Velmurugan           |



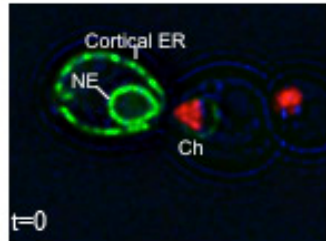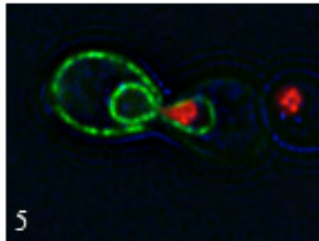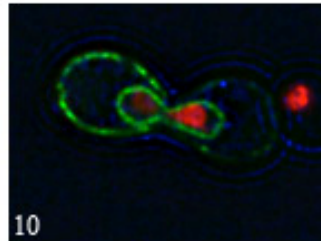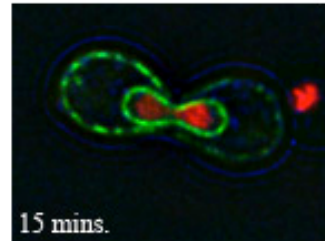

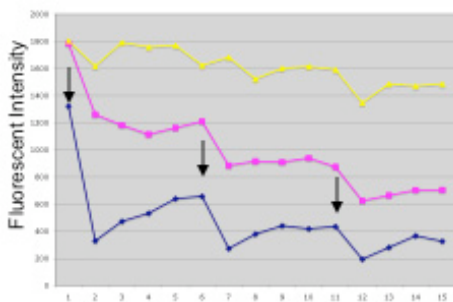

HMG1-GFP

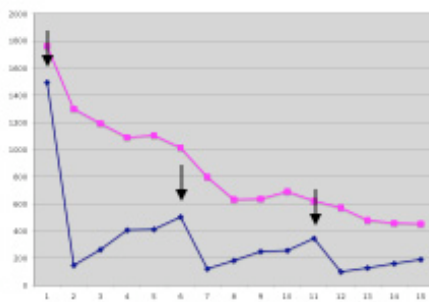

GFP-ESC1

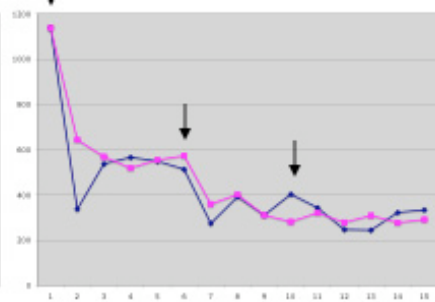

GFP-PRM3

# S3A

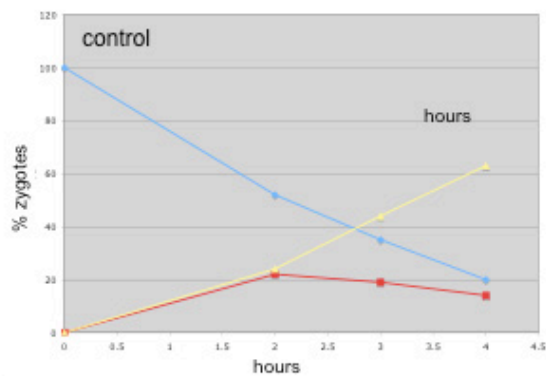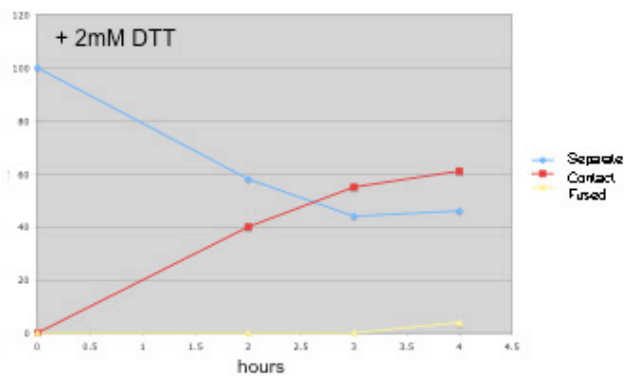

# S3B

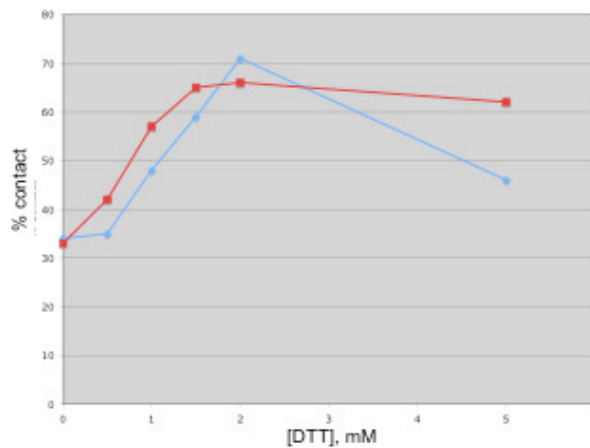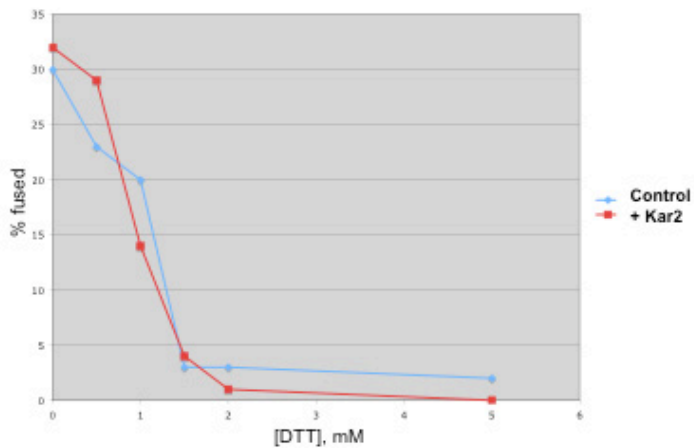

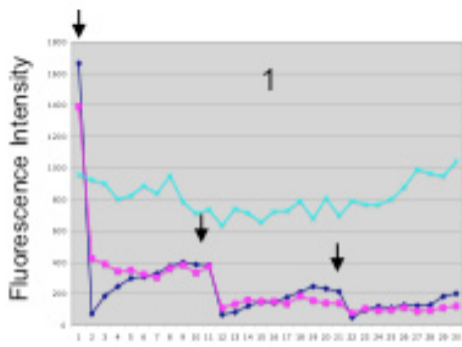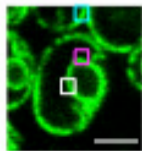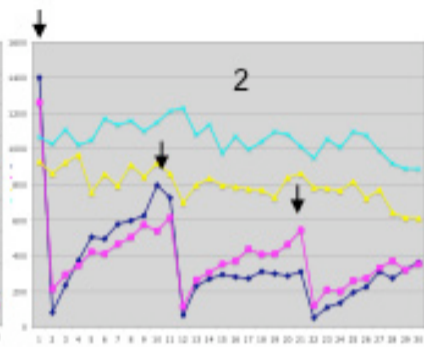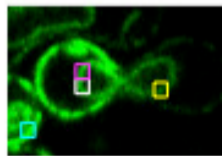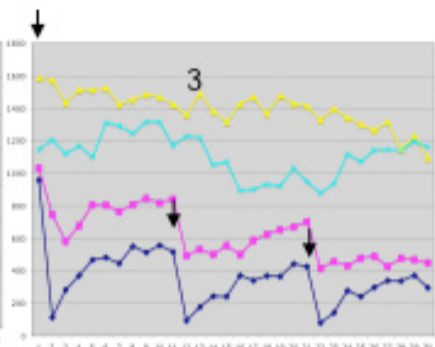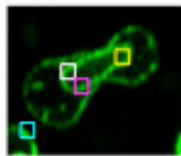

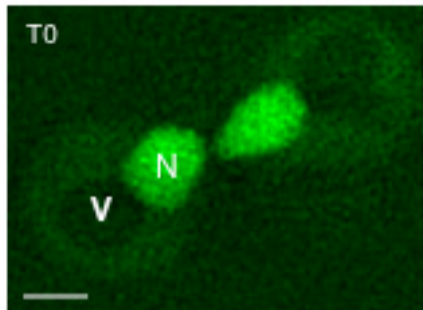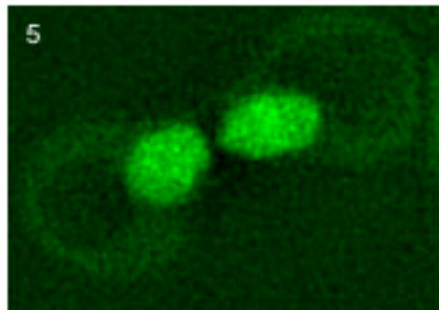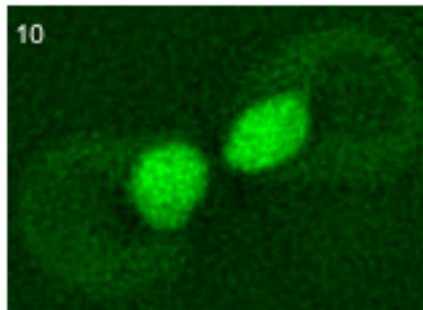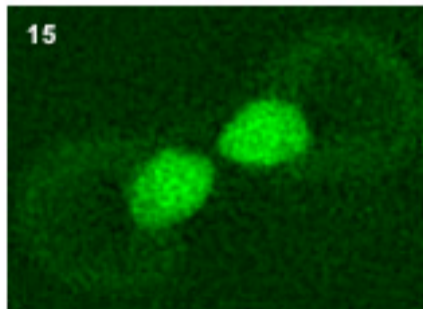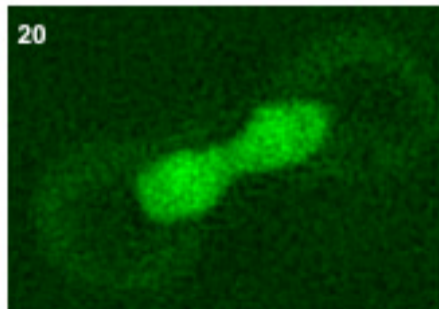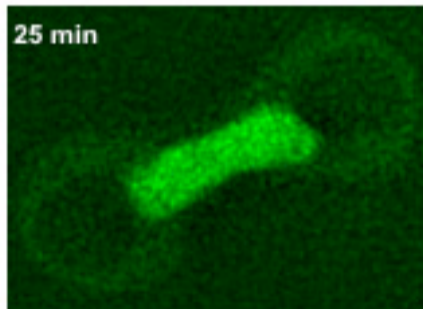

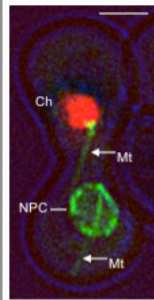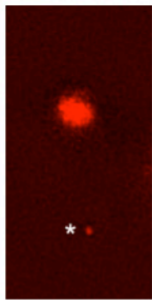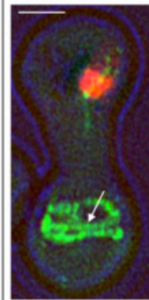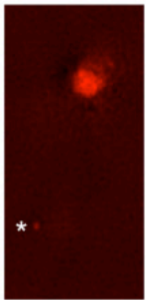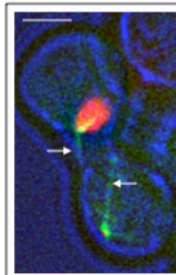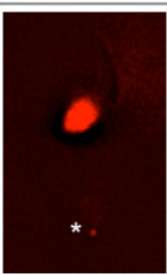

Supplement: E08-12-1193_1.pdf [file E08-12-1193_1.pdf]
